# Supplementary material for: Mechanically ventilated COVID-19 patients admitted to the intensive care unit in the United States with or without respiratory failure secondary to COVID-19 pneumonia: a retrospective comparison of characteristics and outcomes
Source: PubMed Central journal article supplement — Acute Crit Care. 2023 Aug 23;38(3):298–307. doi: 10.4266/acc.2022.01123 (PMC10497897; doi:10.4266/acc.2022.01123), 2023-08-23
Supplement: acc-2022-01123-Supplementary-Table-1.pdf [file acc-2022-01123-Supplementary-Table-1.pdf]

**Supplementary Table 1.** Multivariable logistic regression model for hospital death in mechanically ventilated COVID-19 patients without acute hypoxemic respiratory failure secondary to COVID pneumonia

| Characteristic                                | Adjusted odds ratio (95% CI) | P-value |
|-----------------------------------------------|------------------------------|---------|
| Age >65 yr                                    | 1.40 (0.63–3.12)             | 0.41    |
| Female                                        | 0.61 (0.26–1.40)             | 0.25    |
| Race other than white                         | 1.61 (0.73–3.54)             | 0.24    |
| Body mass index $\geq 30$ kg/m <sup>2</sup>   | 1.13 (0.50–2.55)             | 0.77    |
| PaO <sub>2</sub> /FiO <sub>2</sub> $\leq 150$ | 2.11 (0.67–6.63)             | 0.20    |
| APACHE II (1-unit increase)                   | 1.08 (1.03–1.13)             | 0.002   |
| Diabetes mellitus                             | 2.79 (1.22–6.40)             | 0.02    |
| COPD/asthma                                   | 2.66 (0.88–8.00)             | 0.08    |
| Cerebrovascular accident                      | 1.19 (0.41–3.45)             | 0.75    |
| Congestive heart failure                      | 0.66 (0.21–2.04)             | 0.47    |
| Cancer                                        | 1.60 (0.59–4.37)             | 0.36    |
| Hypertension                                  | 0.86 (0.39–1.89)             | 0.71    |
| Coronary artery disease                       | 0.55 (0.18–1.68)             | 0.30    |

COVID-19: coronavirus disease 2019; CI: confidence interval; PaO<sub>2</sub>/FiO<sub>2</sub>: arterial partial pressure of oxygen divided by inspired oxygen concentration; APACHE: Acute Physiology and Chronic Health Evaluation; COPD: chronic obstructive pulmonary disease.
